# Supplementary material
Source: publisher figshare collection journal article supplement (https://diabetesjournals.figshare.com/ndownloader/files/25284026)
Supplement: Supplementary file 1 [file 25284026]

---

## **Supplementary appendix**

### **Supplemental text**

#### **Metadata in GNHS and the hip fracture case-control study**

Metadata included in this study was further categorized into 4 groups:

1) 5 demographic factors: age, sex, household income, marital status and self-reported educational level.

2) 10 lifestyle and dietary factors: physical activity, total energy intake, alcohol drinking, smoking, tea drinking, vegetable intake, fruit intake, fish intake, red and processed meat intake, and yogurt intake.

3) 5 blood test factors: Fasting glucose, HDL, LDL, TC, and TG.

4) 8 anthropometry factors: height, weight, hip circumference, waist circumference, neck circumference, BMI, DBP, SBP.

Description of each factor in different cohorts is listed in Table 1.

Demographic, lifestyle and dietary factors were all collected by questionnaire during on-site face-to-face interviews. Habitual dietary intakes over the past 12 months were assessed by a food frequency questionnaire, as previously described (1). Physical activity was assessed as a total metabolic equivalent for task (MET) hours per day on the basis of a validated questionnaire for physical activity (2). Anthropometric factors were measured by trained nurses on site during the baseline interview. Fasting venous blood samples were taken at each recruitment or follow-up visit. Serum low-density lipoprotein cholesterol and glucose were measured by colorimetric methods using a

---

Roche Cobas 8000 c702 automated analyzer (Roche Diagnostics GmbH, Shanghai, China). Intra-assay coefficients of variation (CV) was 2.5% for glucose. Insulin was measured by electrochemiluminescence immunoassay (ECLIA) methods using a Roche cobas 8000 e602 automated analyzer (Roche Diagnostics GmbH, Shanghai, China). High-performance liquid chromatography was used to measure glycated hemoglobin (HbA1c) using the Bole D-10 Hemoglobin A1c Program on a Bole D-10 Hemoglobin Testing System, and the intraassay CV was 0.75%. The whole-body composition was measured by dual-energy x-ray absorptiometry (DXA) (Discovery W; Hologic Inc.). We analyzed the lean mass, fat mass and bone mass of the whole body, arms, and legs using the Hologic Discovery software version 3.2 (3).

#### **Stool sample collection and DNA extraction**

The stool samples were collected at a local study site within the School of Public Health at Sun Yat-sen University, and were transferred to a -80°C facility within 4 hours after collection. Total bacterial DNA was extracted using the QIAamp® DNA Stool Mini Kit (Qiagen, Hilden, Germany) following the manufacturer's instructions. DNA concentrations were measured using the Qubit quantification system (Thermo Scientific, Wilmington, DE, US). The extracted DNA was then stored at -20 °C.

#### **16S gene amplicon sequencing**

The 16S rRNA gene amplification procedure was divided into two PCR steps, in the first PCR reaction, the V3-V4 hypervariable region of the 16S rRNA gene was

---

45 amplified from genomic DNA using primers 341F(CCTACGGGNGGCWGCAG) and  
46 805R(GACTACHVGGGTATCTAATCC). Amplification was performed in 96-well  
47 microtiter plates with a reaction mixture consisting of 1X KAPA HiFi Hot start Ready  
48 Mix, 0.1µM primer 341 F, 0.1 µM primer 805 R, and 12.5 ng template DNA giving a  
49 total volume of 50 µL per sample. Reactions were run in a T100 PCR thermocycle  
50 (BIO-RAD) according to the following cycling program: 3 min of denaturation at  
51 94 °C, followed by 18 cycles of 30 s at 94 °C (denaturing), 30 s at 55 °C (annealing),  
52 and 30 s at 72 °C (elongation), with a final extension at 72 °C for 5 min. Subsequently,  
53 the amplified products were checked by 2% agarose gel electrophoresis and ethidium  
54 bromide staining. Amplicons were quantified using the Qubit quantification system  
55 (Thermo Scientific, Wilmington, DE, US) following the manufacturers' instructions.  
56 Sequencing primers and adaptors were added to the amplicon products in the second  
57 PCR step as follows 2 µL of the diluted amplicons were mixed with a reaction  
58 solution consisting of 1×KAPA HiFi Hotstart ReadyMix, 0.5µM fusion forward and  
59 0.5µM fusion reverse primer, 30 ng Meta-gDNA(total volume 50 µL). The PCR was  
60 run according to the cycling program above except with cycling number of 12. The  
61 amplification products were purified with Agencourt AMPure XP Beads (Beckman  
62 Coulter Genomics, MA, USA) according to the manufacturer's instructions and  
63 quantified as described above. Equimolar amounts of the amplification products were  
64 pooled together in a single tube. The concentration of the pooled libraries was  
65 determined by the Qubit quantification system. Amplicon sequencing was performed  
66 on the Illumina MiSeq System (Illumina Inc., CA, USA). The MiSeq Reagent Kits v2

(Illumina Inc.) was used. Automated cluster generation and  $2 \times 250$  bp paired-end sequencing with dual-index reads were performed.

## 16S rRNA gene sequence data processing

Fastq-files were demultiplexed by the MiSeq Controller Software (Illumina Inc.). The sequence was trimmed for amplification primers, diversity spacers, and sequencing adapters, merge-paired and quality filtered by USEARCH. UPARSE was used for OTU clustering equaling or above 97%. Taxonomy of the OTUs was assigned and sequences were aligned with RDP classifier. The OTUs were analyzed by phylogenetic and operational taxonomic unit (OTU) methods in the Quantitative Insights into Microbial Ecology (QIIME) software version 1.9.0 (4).  $\alpha$ -diversity (Observed OTU number, Shannon index, Simpson index, Chao1 index, Goods coverage index) and  $\beta$ -diversity (Unweight UniFrac distances and Weight UniFrac distances) measures were calculated based on the rarefied OTU counts.

## Type 2 diabetes risk variants and genetic risk score

We used 28 significant variants identified in a meta-analysis of CKB and AGEN-type 2 diabetes studies (5) to construct a type 2 diabetes genetic risk score (GRS) as

$$GRS_i = \sum_{j=1}^m x_{ij} b_j$$

Where,  $GRS_i$  is a genetic risk score for individual  $i$ ,  $m$  is the number of SNPs in the score,  $x_{ij}$  represented the number of the risk allele on two chromosomes for  $i$ th individual and  $j$ th SNP,  $x_{ij} \in \{0,1,2\}$ ,  $b_j$  represent the natural logarithm of the

---

published odds ratio.

### **Metagenomic sequencing**

Samples were metagenomically sequenced as one library each multiplexed through Illumina HiSeq machines and sequenced using the  $2 \times 100$  bp paired-end read protocol. PRINSEQ v0.20.4 (6) was employed to sample dereplication and low complexity filtering. The length of each reads was trimmed with FASTX from the 5' e and 3' end using a quality threshold of 20. Read pairs with either reads was shorter than 60 bp or contained "N" were removed. 3) deduplicate the reads. Bowtie2 v2.2.5 (7) (using --reorder --no-contain --dovetail) was used to map reads to the human genome for decontamination.

### **Taxonomy analysis**

Taxonomic profiling of the metagenomic samples was performed using MetaPhlAn2 v2.6.02, which uses a library of clade-specific markers to provide pan-microbial (bacterial, archaeal, viral and eukaryotic) quantification at the species level. MetaPhlAn2 (8) was run using default settings.

### **Metabolomics profiling of human serum samples**

For the discovery cohort and external validation cohort1, targeted identification and quantification of serum metabolites was performed using an ultra-performance liquid chromatography coupled to tandem mass spectrometry (UPLC-MS/MS) system. This

---

platform provides measures of 199 serum metabolome traits, including 12 subclasses.

All of the standards of targeted metabolites were commercially purchased from Sigma-Aldrich (St. Louis, MO, USA), Steraloids Inc. (Newport, RI, USA) and TRC Chemicals (Toronto, ON, Canada). All the standards were prepared in water, methanol, sodium hydroxide solution, or hydrochloric acid solution to obtain individual stock solution at a concentration of 5.0 mg/mL. Appropriate amount of each stock solution was mixed to create stock calibration solutions.

Samples were thawed on ice-bath to diminish sample degradation and prepared as follows: 25µL of plasma was added to a 96-well plate and then the plate was transferred to the Biomek 4000 workstation (Biomek 4000, Beckman Coulter, Inc., Brea, California, USA). Three types of quality control samples i.e., test mixtures, internal standards, and pooled biological samples are routinely used in metabolomics platform. In addition to the quality controls, conditioning samples, and solvent blank samples are also required for obtaining optimal instrument performance. 100µL ice cold methanol with partial internal standards was automatically added to each sample and vortexed vigorously for 5 minutes. The plate was centrifuged at 4000g for 30 minutes (Allegra X-15R, Beckman Coulter, Inc., Indianapolis, IN, USA). Then the plate was returned back to the workstation. 30µL of supernatant was transferred to a clean 96-well plate, and 20µL of freshly prepared derivative reagents was added to each well. The plate was sealed and the derivatization was carried out at 30°C for 60 min. After derivatization, 350µL of ice-cold 50% methanol solution was added to

---

dilute the sample. Then the plate was stored at -20°C for 20 minutes and followed by 4000g centrifugation at 4 °C for 30 minutes. 135µL of supernatant was transferred to a new 96-well plate with 15µL internal standards in each well. Serial dilutions of derivatized stock standards were added to the left wells. Finally, the plate was sealed for LC-MS analysis. The raw data files from UPLC-MS/MS were processed using the QuanMET software (v2.0, Metabo-Profile, Shanghai, China) to perform peak integration, calibration, and quantitation for each metabolite.

#### **Classification Analysis**

To train and validate our model, we divided the discovery cohort into three parts randomly at a ratio of 6:2:2, which were allocated at the training cohort, internal validation cohort, and internal test cohort, respectively. The hyperparameters of the model were tuned on the internal validation cohort.

In the discovery cohort and external validation cohort 1, we calculated the area under the receiver operating curve (AUC) for type 2 diabetes prediction for the identified microbiota features, host genetics (type 2 diabetes genetic risk score), and the traditional type 2 diabetes risk factors including the Framingham-Offspring Risk Score (FORS) components(age, sex, parental history of diabetes, BMI, systolic blood pressure, high-density lipoprotein cholesterol, triglycerides, and waist circumference), lifestyle and dietary factors (current smoking status, current tea-drinking, current alcohol drinking, physical activity, total energy intake, vegetable intake, fish intake,

red and processed meat intake, fruit intake and yogurt intake).

### Microbiome risk score (MRS) formula

$$MRS_i = \sum_{j=1}^n s_{ij}$$

Where,  $MRS_i$  is a MRS for individual  $i$ ,  $s_{ij} = \begin{cases} 0, & \text{if } x_{shap,ij} < 0 \\ 1, & \text{if } x_{shap,ij} > 0 \end{cases}$ ,  $s_{ij}$  is the microbiome risk score for the  $j$ th microbiome features in  $i$ th individual.  $n$  is the sum of the microbiome features, and  $x_{shap,ij}$  is the SHAP value for the  $j$ th microbiome features in  $i$ th individual.

### Faecal suspension inoculum preparation and faecal microbiota transplantation

Nine participants were randomly selected as the representative donors according to the level of the MRS (ranges from 0-14):

- (1) Low MRS group: 3 participants, MRS=0, or MRS=1.
- (2) High MRS + non-type 2 diabetes group: 3 participants, MRS=11.
- (3) High MRS + type 2 diabetes group: 3 participants, MRS=13, or MRS=14.

Each fecal sample (0.5 g) was diluted in 5 mL of a 0.09% (w/v) sterile normal saline in an anaerobic chamber (80% N<sub>2</sub>:10% CO<sub>2</sub>:10% H<sub>2</sub>). The fecal material was suspended by thorough vortexing (5 min) and centrifuged at 4 °C 300 rpm/min for 5 min. The clarified supernatant was transferred to a clean tube and used immediately for gut microbiota transplantation. Surveillance for bacterial contamination was performed by periodic bacteriological examinations of feces, food and padding.



---

Normal saline was added into the samples with sufficient mixing. The mixtures were then cultured using the spread plate method on: 1) LB agar, Brain Heart Infusion agar and Thioglycolate agar under aerobic condition at 37°C for aerobic bacteria; 2) on Gifu anaerobic medium (GAM) agar under anaerobic condition at 37°C for anaerobic bacteria; and 3) on Modified Martin Agar and Tryptone Soya agar under aerobic condition at 25-28°C for fungi. All cultures were examined under optical microscope after 1, 2, 4, 7 and 14 days.

Weaned, germ-free male C57BL/6J mice ( $n = 40$ ) were maintained in flexible-film plastic isolators under a regular 12-h light cycle (lights on at 06:00). The mice were fed a sterilized normal chow diet (10% energy from fat; 3.25 kcal/g; SLAC). At 4 weeks of age, the germ-free mice were housed in individual cages and randomly divided into four groups (each group was kept in an individual isolator). After 1 weeks of acclimatization, the CON group of mice ( $n = 10$ ) were orally gavaged with 100  $\mu$ L of normal saline, and the other three groups of mice ( $n = 10$ , per group) were orally gavaged with 100  $\mu$ L of the fecal suspension inoculum (taken from the each of the above donor group, preparation methods see supplementary materials). All mice were fed a sterilized high-fat diet. On Day 0, 7 and 14, after 12 h of fasting, fasting glucose was measured through the tail vein (Sinocare, China).

---

## Reference

1. Zhang CX HS. Validity and reproducibility of a food frequency Questionnaire among Chinese women in Guangdong province. *Asia Pac J Clin Nutr.* 2009;18:240–50.
2. Liu B, Woo J, Tang N, Ng K, Ip R, Yu A. Assessment of total energy expenditure in a Chinese population by a physical activity questionnaire : examination of validity. *Int J Food Sci Nutr.* 2001;52:269–82.
3. Chen Y, Liu Y, Liu Y, Wang X, Guan K, Zhu H. Higher serum concentrations of betaine rather than choline is associated with better profiles of DXA-derived body fat and fat distribution in Chinese adults. 2014;39(3):465–71.
4. Caporaso JG, Kuczynski J, Stombaugh J, Bittinger K, Bushman FD, Costello EK, et al. QIIME allows analysis of high-throughput community sequencing data. *Nat Methods.* 2010;7(5):335–6.
5. Gan W, Walters RG, Holmes M V., Bragg F, Millwood IY, Banasik K, et al. Evaluation of type 2 diabetes genetic risk variants in Chinese adults: findings from 93,000 individuals from the China Kadoorie Biobank. *Diabetologia.* 2016;59(7):1446–57.
6. Schmieder R, Edwards R. Quality control and preprocessing of metagenomic datasets. *Bioinformatics.* 2011;27(6):863–4.
7. Ben Langmead SLS. Fast gapped-read alignment with Bowtie 2. *Nat Methods.* 2012;9(4):357–9.
8. Senavirathne G, Liu J, Jr MAL, Hanne J, Martin-lopez J, Lee J, et al.

---

221           MetaPhlAn2 for enhanced metagenomic taxonomic profiling. Nat Methods.

222           2015;12(10):902–3.

223

224

225

226

227

228

229

230

231

232

233

234

235

236

237

238

239

240

241

242

---

**Fig.S1. Study overview. (A)** Identifying microbiome features, together with their optimal threshold and direction associated with type 2 diabetes. 1) Training and optimizing a machine-learning model to link the input factors with type 2 diabetes in a discovery cohort (n=1832, 270 cases); 2) Using SHAP method to explain the output of machine learning model and identify the microbiota pattern associated with type 2 diabetes risk; 3) Constructing a microbiome risk score (MRS) for type 2 diabetes based on the above-identified microbiota pattern. 4) Validating the MRS-type 2 diabetes association in two independent external validation cohorts: cohort 1 (n=203, 48 cases), cohort 2 (n=7009, 608 cases); 5) Validating the MRS-type 2 diabetes association by faecal microbiota transplantation (FMT). **(B)** Investigating the prospective association of baseline adiposity, dietary and lifestyle factors with the identified type 2 diabetes-related gut microbiota pattern (i.e., MRS), and the correlation of the MRS with host serum metabolome. Further, we investigated the role of body fat distribution linking the MRS and type 2 diabetes development in the discovery cohort and external validation cohort 1.

A.

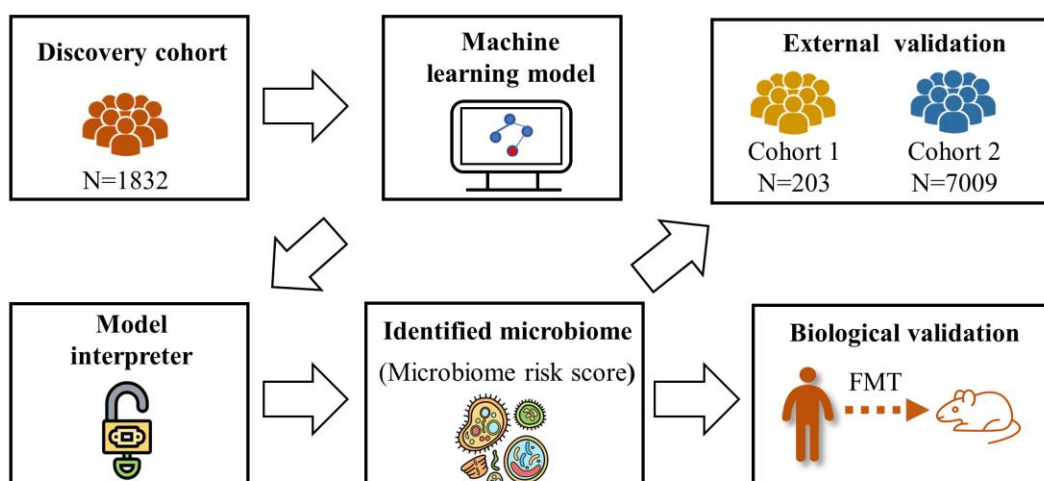

B.

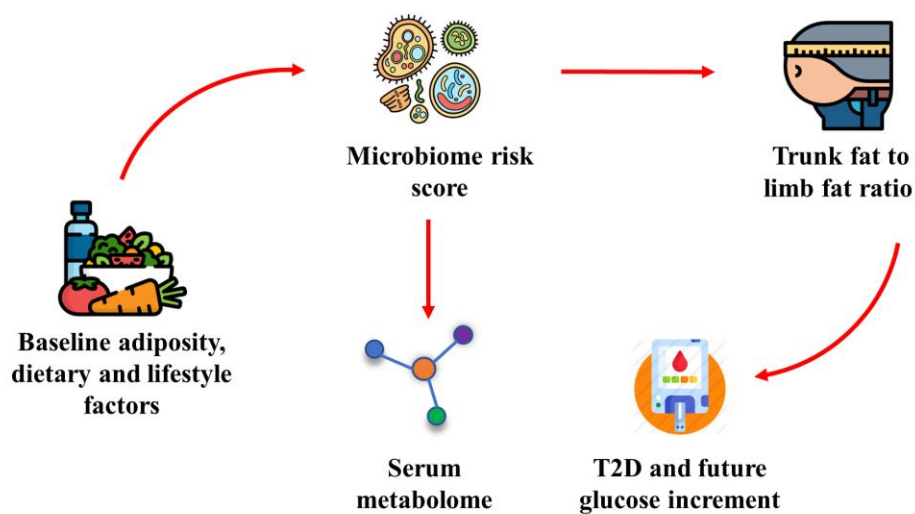

265

266

267

268

269

270

271

272

273

---

**Fig.S2. Overview of the discovery cohort: Guangzhou Nutrition and Health****Study**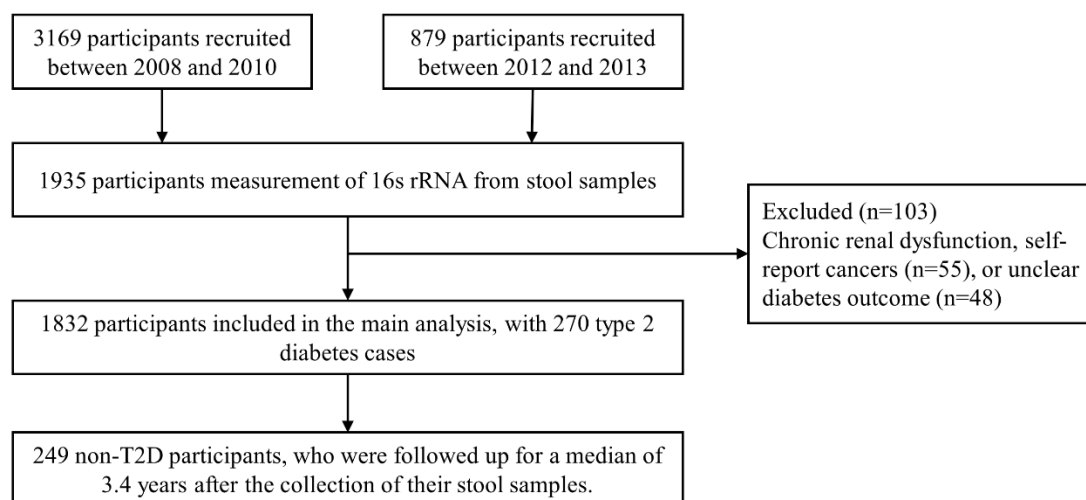

**Fig.S3. The average impact of selected features on type 2 diabetes risk. The bars are colored according to data categories.**

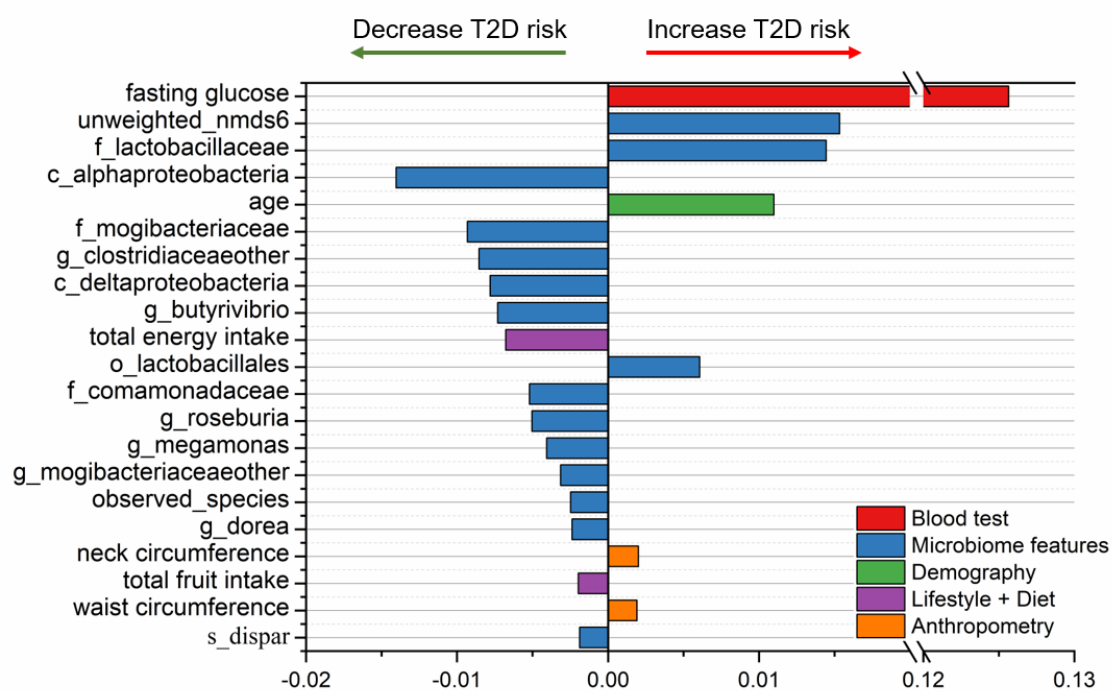

**Fig.S4. The inter-correlation of selected taxa-related features in the discovery cohort (A) and external validation cohort 1 (B).**

**A.**

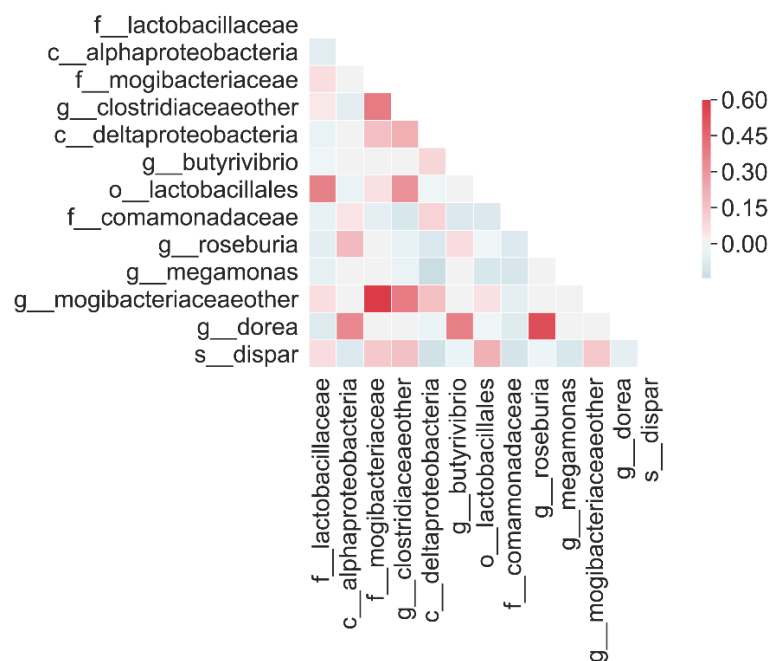

**B.**

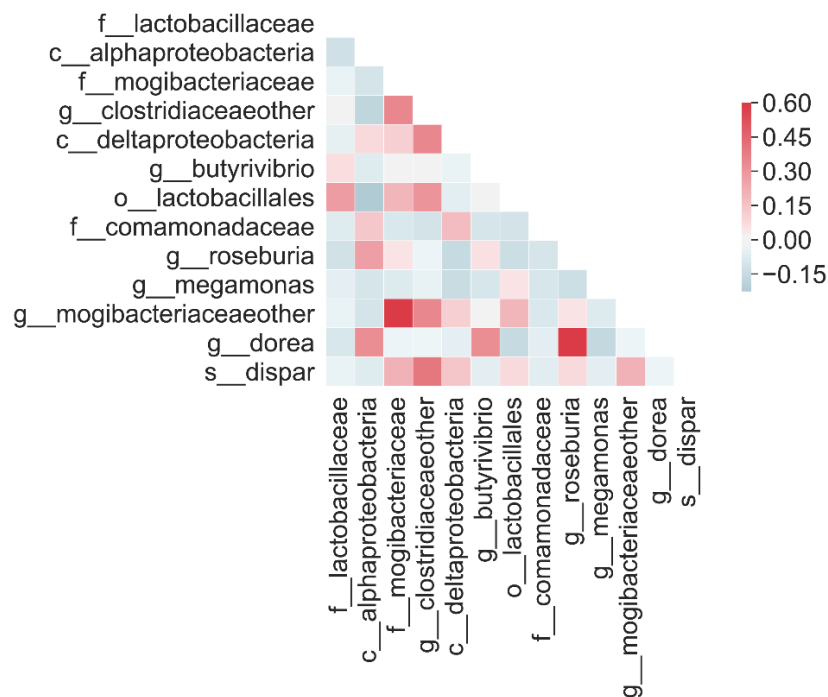



**Fig.S5. Association of the microbiome risk score (MRS) with type 2 diabetes risk in different cohorts.** Poisson regression was used to estimate the risk ratio (RR) and 95% confidence interval (CI) of type 2 diabetes per one unit change in the MRS, adjusting for demographic, dietary and lifestyle factors. The MRS was constructed based on the conventional method.

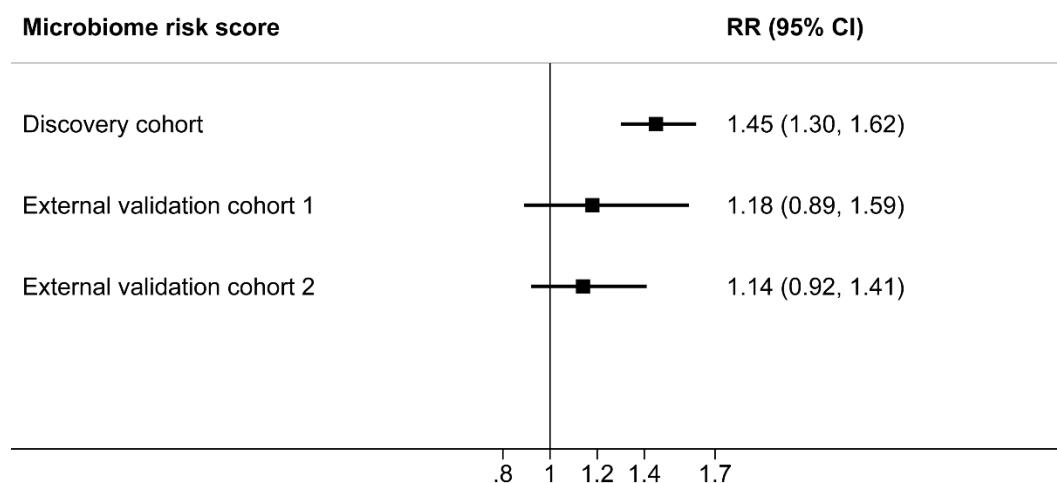

**Fig.S6. The marginal effect of individual selected features on type 2 diabetes. We**

plot the SHAP values of every feature for each sample. X-axis represents the feature

variable, while Y-axis represents the SHAP value for the feature variable. SHAP value

greater than zero indicates that the feature may increase the type 2 diabetes risk for

the given sample, otherwise, decrease the disease risk.

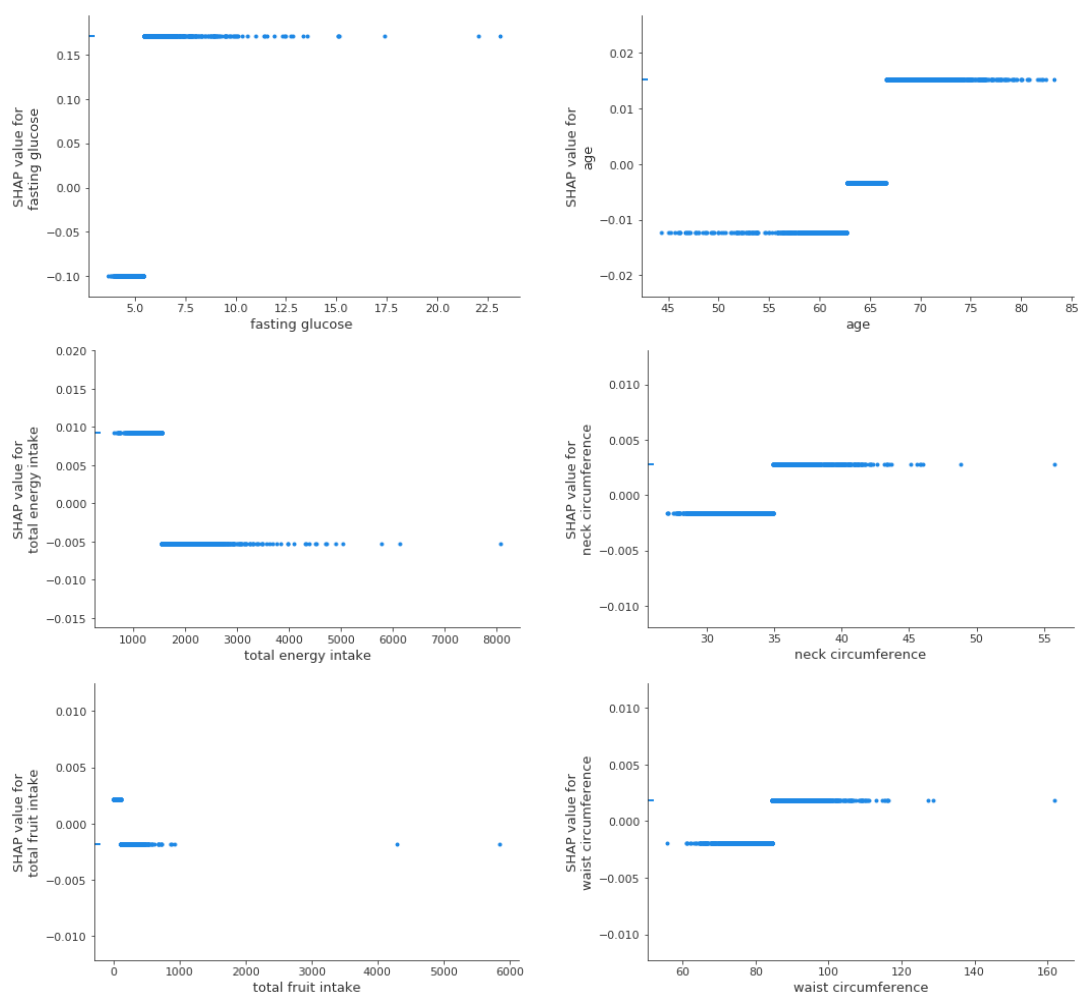

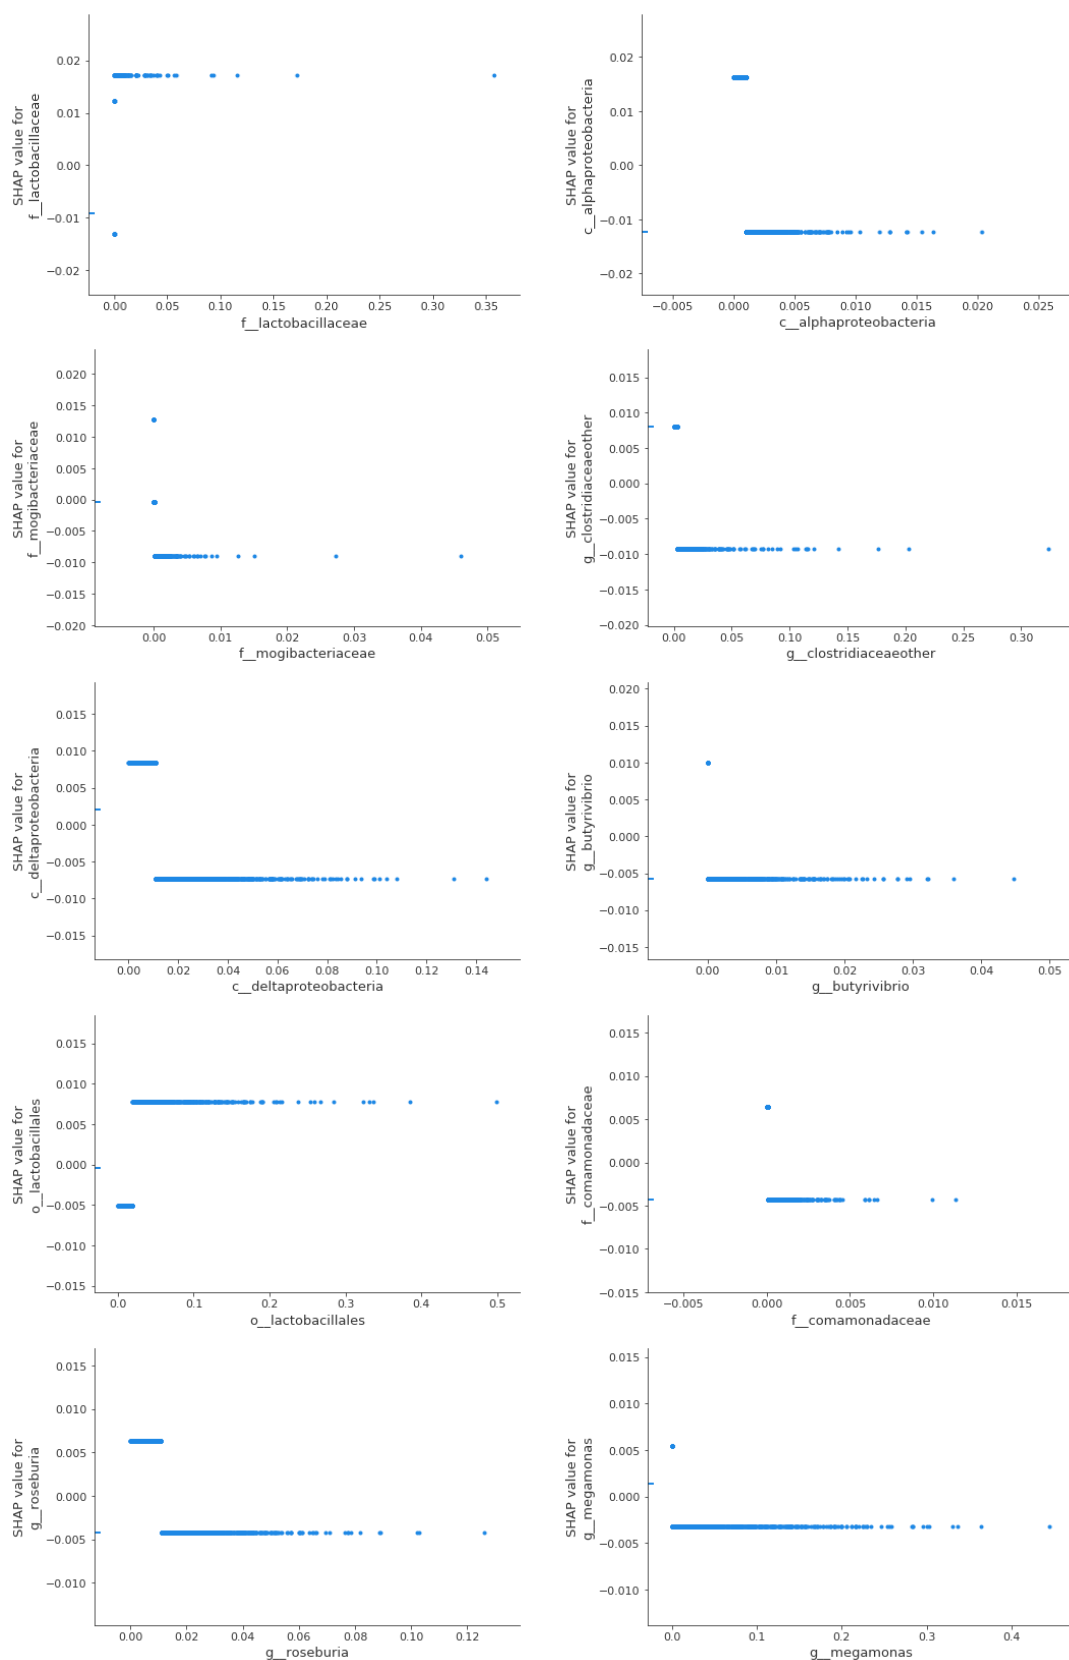

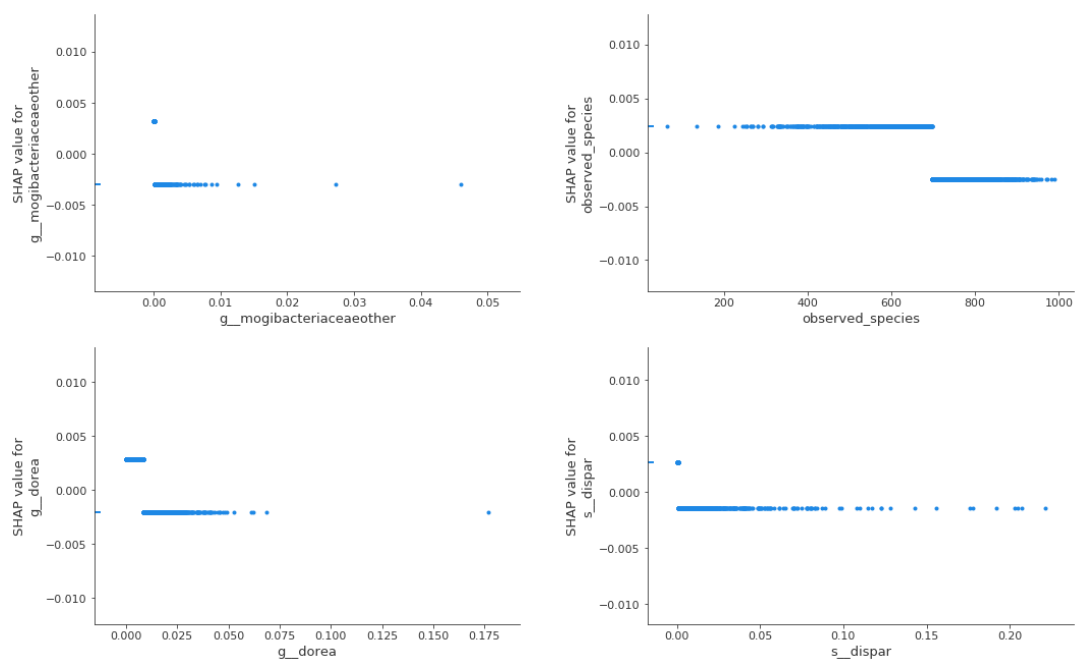

---

**Fig.S7. Associations of the selected microbiome features with risk of type 2**

**diabetes.** In this graph, we only present the microbiome that was significantly associated with type 2 diabetes risk. (A) Multivariable Poisson regression model was used to examine the association with type 2 diabetes for each selected taxa-related feature at higher abundance (i.e., higher the optimal threshold) with those at lower abundance (i.e., lower the optimal threshold). Covariates included in the statistical models for the discovery cohort and external validation cohort 1 were as follows: age, sex, BMI, waist circumference, total energy intake, alcohol drinking, smoking, household income, marital status, and self-reported educational level. For external validation cohort 2, all aforementioned covariates but total energy intake (not collected in external validation cohort 2) were used in the statistical model. (B) Multivariable Poisson regression model was used to estimate type 2 diabetes risk per SD change in the selected taxa-related features, adjusted for the abovementioned covariates.

A.

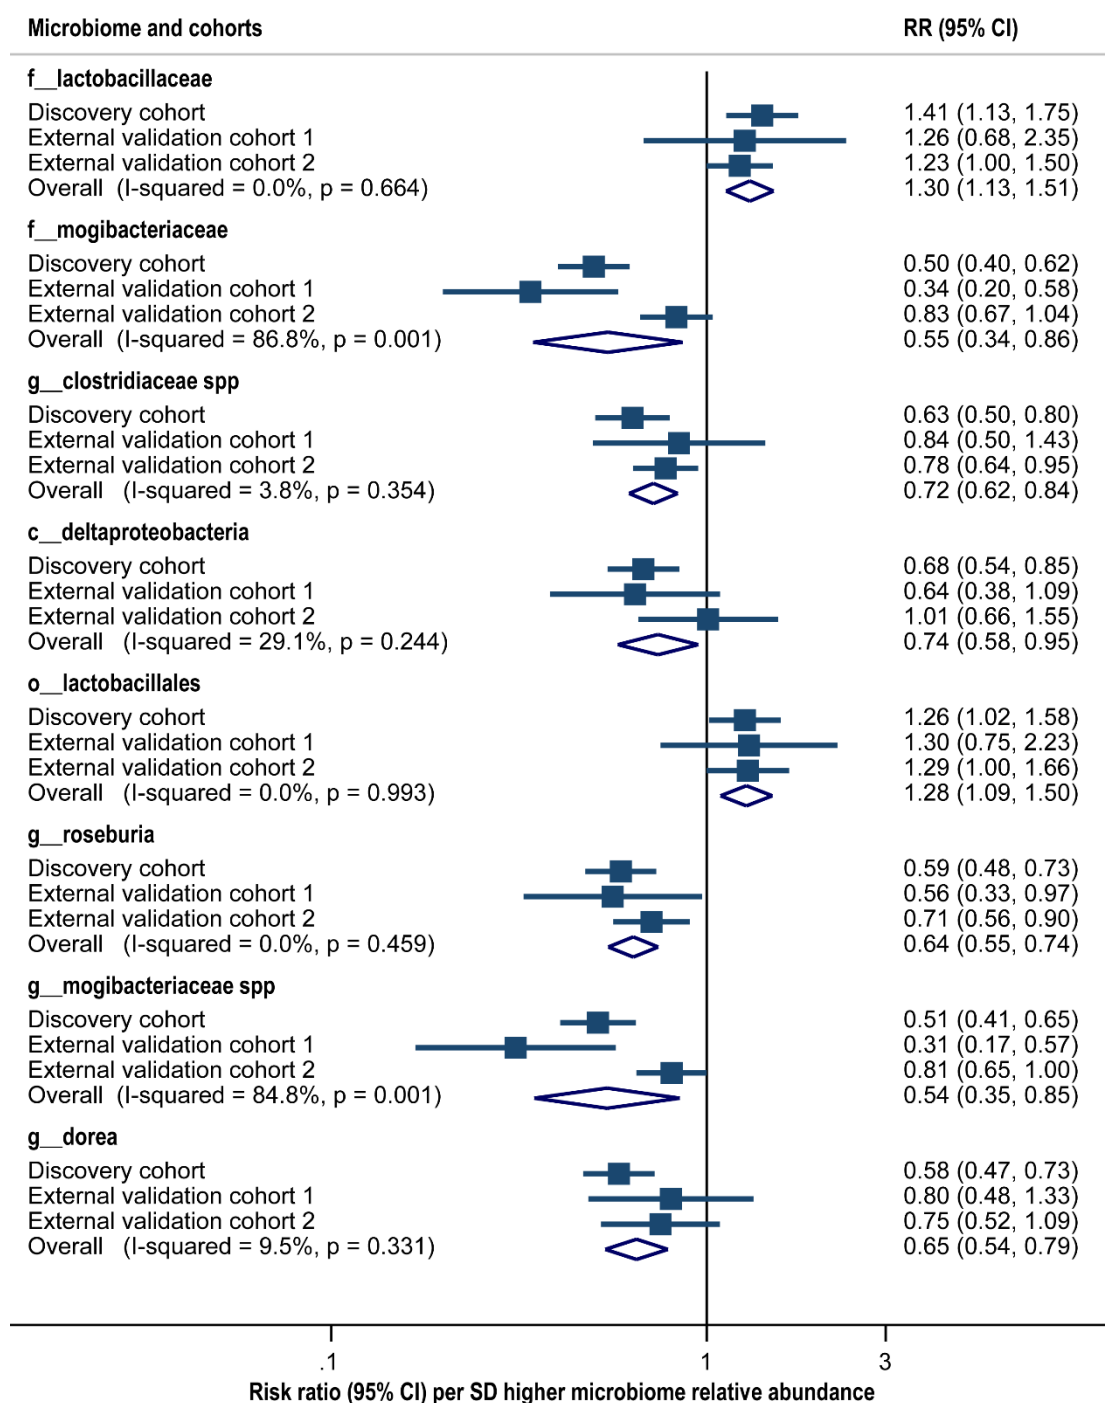

**B.**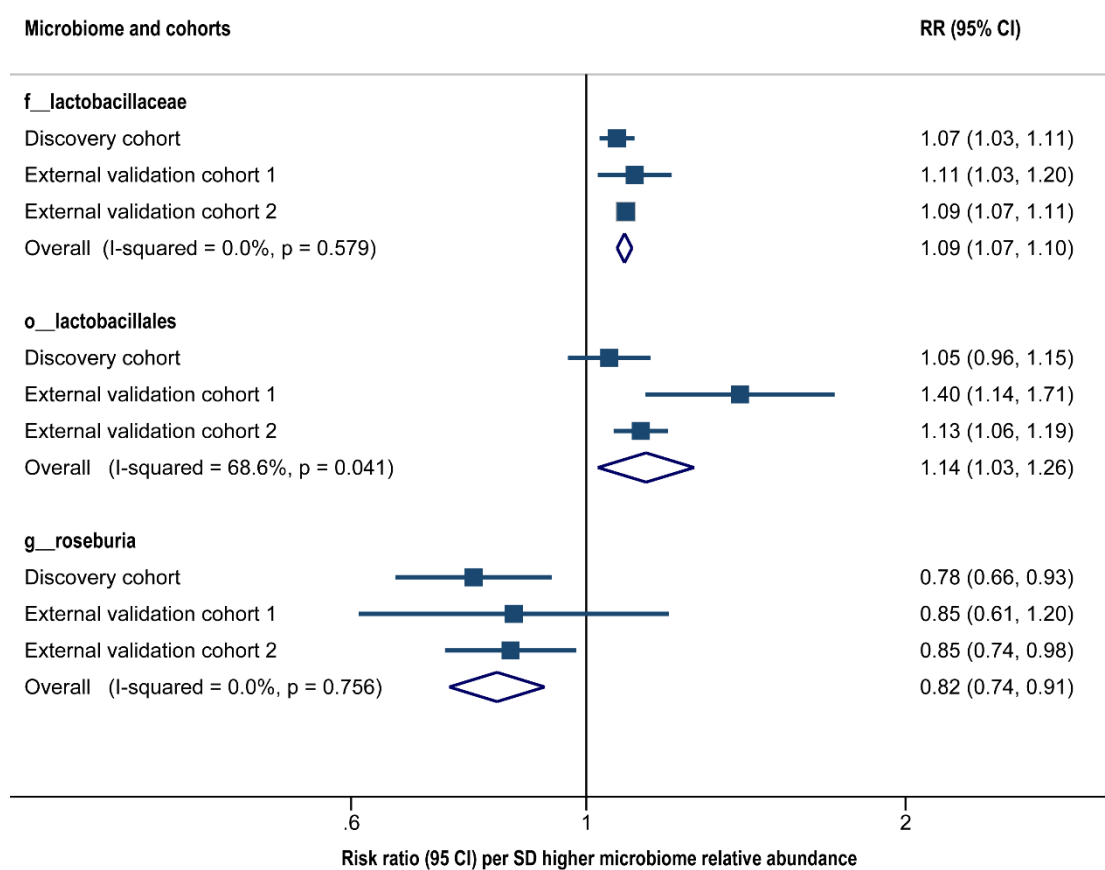

**Fig.S8. Identified gut microbiota affects the type 2 diabetes development in germ-free mice.** (A) Schematic diagram. (B) Fasting glucose curves. (C) Quantification of fasting glucose by AUC. \* compared with CON group, # compared with Low MRS group, + compared with High MRS+non-type 2 diabetes group. (\*, #, +)  $P < 0.05$ , (\*\*, ##, ++)  $P < 0.01$ , (\*\*\*, ###, +++)  $P < 0.001$  by ANOVA. The P-values were adjusted using the Benjamini and Hochberg method.

**A.**

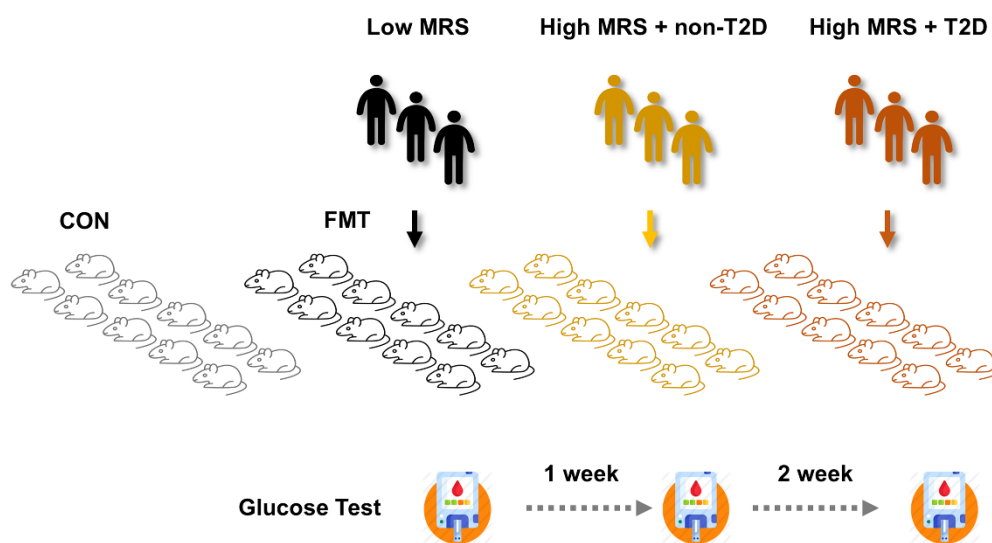

**B.**

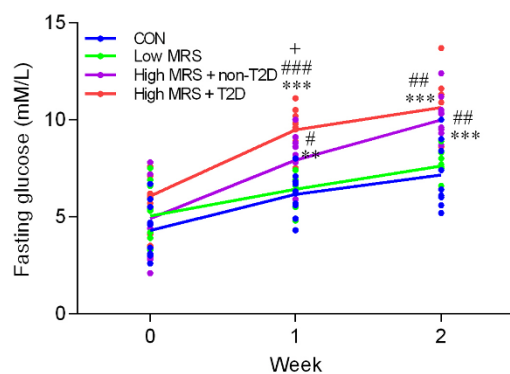

**C.**

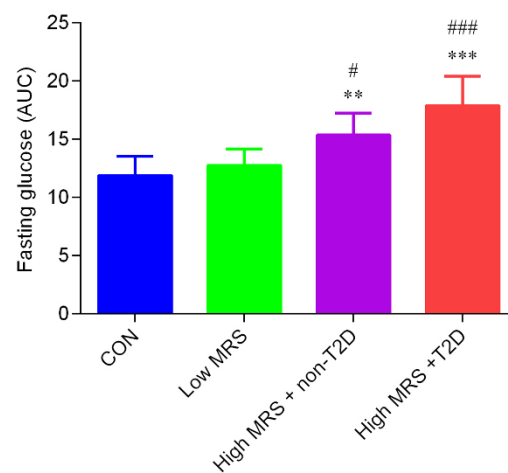



**Table S1. Comparison of the prediction performance of LightGBM, random forest and logistic regression in the discovery cohort and validation cohort 1.**

| Algorithm           | Discovery cohort |               |               | Validation cohort 1 |
|---------------------|------------------|---------------|---------------|---------------------|
|                     | AUC (mean)       | AUC (minimum) | AUC (maximum) | AUC                 |
| LightGBM            | 0.93             | 0.9           | 0.95          | 0.84                |
| Random forest       | 0.84             | 0.79          | 0.88          | 0.53                |
| Logistic regression | 0.92             | 0.87          | 0.97          | 0.53                |

**Table S2. Comparison of the prediction performance of all inputted and selected features in different cohorts.**

| <b>Features</b>        | <b>Discovery cohort</b> |               |               | <b>Validation cohort 1</b> |
|------------------------|-------------------------|---------------|---------------|----------------------------|
|                        | AUC (mean)              | AUC (minimum) | AUC (maximum) | AUC                        |
| 297 features           | 0.93                    | 0.9           | 0.95          | 0.84                       |
| Identified 21 features | 0.92                    | 0.9           | 0.94          | 0.84                       |

**Table S3. Association of the gut microbiome risk score (MRS) with type 2 diabetes\***

| Cohorts                             | Median (MRS) | No. of cases / Total No. | Adjusted risk ratio (95% CI) | P value |
|-------------------------------------|--------------|--------------------------|------------------------------|---------|
| <b>Discovery cohort</b>             |              |                          |                              |         |
| Quartile 1                          | 3            | 33 / 569                 | 1 (reference)                |         |
| Quartile 2                          | 5            | 62 / 515                 | 2.02 (1.35, 3.02)            | <0.001  |
| Quartile 3                          | 7            | 70 / 419                 | 2.73 (1.85, 4.04)            | <0.001  |
| Quartile 4                          | 10           | 101 / 304                | 5.29 (3.66, 7.65)            | <0.001  |
| <b>External validation cohort 1</b> |              |                          |                              |         |
| Quartile 1                          | 4            | 7 / 65                   | 1 (reference)                |         |
| Quartile 2                          | 6            | 4 / 31                   | 1.47 (0.49, 4.43)            | 0.49    |
| Quartile 3                          | 7            | 15 / 53                  | 2.6 (1.17, 5.79)             | 0.019   |
| Quartile 4                          | 10           | 17 / 39                  | 4.17 (1.96, 8.85)            | <0.001  |
| <b>External validation cohort 2</b> |              |                          |                              |         |
| Quartile 1                          | 6            | 236 / 3065               | 1 (reference)                |         |
| Quartile 2                          | 7            | 147 / 1672               | 1.11 (0.91, 1.35)            | 0.31    |
| Quartile 3                          | 8            | 110 / 1104               | 1.27 (1.03, 1.57)            | 0.025   |
| Quartile 4                          | 9            | 104 / 946                | 1.36 (1.10, 1.68)            | 0.0051  |

\*Poisson regression was used to estimate the risk ratio (RR) and 95% confidence interval (CI) of type 2 diabetes in each of the three cohorts, according to the gut microbiome risk score. In these comparisons, participants at low microbiome risk (Quartile 1) were treated as the reference group. The covariates for the discovery cohort and validation cohort 1 were total energy intake, age, waist circumference, sex, BMI, alcohol status, smoking status, education, marital status and income. For the validation cohort 2 (GGMP), covariates including age, waist circumference, sex, BMI, alcohol status, smoking status, education, marital status.

**Table S4. Association of the gut microbiome risk score with type 2 diabetes stratified by age and sex in the discovery cohort \***

|            | Mean<br>(Microbiome risk score) | No. of cases /<br>Total No. | Adjusted risk ratio<br>(95% CI) | P value |
|------------|---------------------------------|-----------------------------|---------------------------------|---------|
| <b>Age</b> |                                 |                             |                                 |         |
| < median   | 5.7                             | 94 / 910                    | 1.31 (1.21, 1.41)               | <0.001  |
| ≥ median   | 6.1                             | 172 / 897                   | 1.27 (1.21, 1.33)               | <0.001  |
| <b>Sex</b> |                                 |                             |                                 |         |
| Men        | 6                               | 103 / 601                   | 1.24 (1.17, 1.32)               | <0.001  |
| Women      | 5.9                             | 163 / 1206                  | 1.29 (1.23, 1.37)               | <0.001  |

\* Poisson regression was used to performed subgroup analysis for MRS-type 2 diabetes relationship stratified by age (<64.3 years vs. ≥64.3 years, with 64.3 years as the median age of this cohort) and sex in the discovery cohort. The covariates were total energy intake, age, waist circumference, sex, BMI, alcohol status, smoking status, education, marital status and income. The median age of the discovery cohort is 64.3 years.

**Table S5. The optimal threshold of the selected microbiome features according to their SHAP dependence plot**

| Microbiome                 | Optimal threshold<br>(relative abundance) | Taxa annotation                                                                                     |
|----------------------------|-------------------------------------------|-----------------------------------------------------------------------------------------------------|
| f__lactobacillaceae        | 0.0000877                                 | p__Firmicutes; c__Bacilli;<br>o__Lactobacillales; f__lactobacillaceae                               |
| c__alphaproteobacteria     | 0.00101                                   | p__Proteobacteria; c__alphaproteobacteria                                                           |
| f__mogibacteriaceae        | 0.0000403                                 | p__Firmicutes; c__Clostridia;<br>o__Clostridiales; f__mogibacteriaceae                              |
| g__clostridiaceae spp      | 0.00313                                   | p__Firmicutes; c__Clostridia;<br>o__Clostridiales; f__Clostridiaceae; g__                           |
| c__deltaproteobacteria     | 0.0109                                    | p__Proteobacteria; c__deltaproteobacteria                                                           |
| g__butyrivibrio            | 0.0000448                                 | p__Firmicutes; c__Clostridia;<br>o__Clostridiales; f__Lachnospiraceae;<br>g__butyrivibrio           |
| o__lactobacillales         | 0.0193                                    | p__Firmicutes; c__Bacilli;<br>o__lactobacillales                                                    |
| f__comamonadaceae          | 0.0000645                                 | p__Proteobacteria; c__Betaproteobacteria;<br>o__Burkholderiales; f__comamonadaceae                  |
| g__roseburia               | 0.011                                     | p__Firmicutes; c__Clostridia;<br>o__Clostridiales; f__Lachnospiraceae;<br>g__roseburia              |
| g__megamonas               | 0.00054                                   | p__Firmicutes; c__Clostridia;<br>o__Clostridiales; f__Veillonellaceae;<br>g__megamonas              |
| g__mogibacteriaceae<br>spp | 0.0000855                                 | p__Firmicutes; c__Clostridia;<br>o__Clostridiales; f__mogibacteriaceae; g__                         |
| g__dorea                   | 0.00861                                   | p__Firmicutes; c__Clostridia;<br>o__Clostridiales; f__Lachnospiraceae;<br>g__dorea                  |
| s__dispar                  | 0.000757                                  | p__Firmicutes; c__Clostridia;<br>o__Clostridiales; f__Veillonellaceae;<br>g__Veillonella; s__dispar |

**Table S6. Associations of baseline adiposity and dietary factors with microbiome risk score\***

|                               | <b>n</b> | <b>beta</b> | <b>95% CI</b> | <b>p</b> |
|-------------------------------|----------|-------------|---------------|----------|
| Age                           | 1812     | 0.023       | 0.0026, 0.043 | 0.027    |
| Energy intake                 | 1812     | 0.059       | -0.065, 0.18  | 0.35     |
| MET                           | 1812     | -0.02       | -0.12, 0.08   | 0.69     |
| BMI                           | 1812     | 0.1         | 0.023, 0.18   | 0.012    |
| Education                     | 1812     | 0.2         | 0.042, 0.36   | 0.013    |
| Hip circumference             | 1812     | -0.039      | -0.07, -0.007 | 0.017    |
| Waist circumference           | 1812     | -0.0041     | -0.028, 0.02  | 0.74     |
| Neck circumference            | 1812     | -0.037      | -0.099, 0.026 | 0.25     |
| Income                        | 1812     | -0.12       | -0.31, 0.06   | 0.19     |
| Red and processed meat intake | 1812     | -0.051      | -0.16, 0.59   | 0.37     |
| Fruit intake                  | 1812     | -0.025      | -0.14, 0.085  | 0.66     |
| Fish intake                   | 1812     | 0.061       | -0.046, 0.17  | 0.26     |
| Vegetable intake              | 1812     | -0.08       | -0.19, 0.03   | 0.15     |
| Yogurt intake                 | 1812     | -0.027      | -0.13, 0.076  | 0.6      |
| Sex                           | 1812     | 0.035       | -0.38 0.45    | 0.87     |
| Current alcohol drinking      | 1812     | -0.33       | -0.78, 0.12   | 0.15     |
| Current tea drinking          | 1812     | -0.25       | -0.49, -0.018 | 0.035    |
| Current smoke drinking        | 1812     | 0.09        | -0.3, 0.48    | 0.65     |
| Marital status                | 1812     | 0.144       | -0.25, 0.54   | 0.47     |
| Drug use                      | 1812     | 2.56        | 2.18, 2.95    | <0.001   |

\*beta: correlation coefficient of baseline diet and basic attributes with microbiome features; CI: confidence interval.

**Table S7. Associations of the microbiome risk score with body fat distribution in the discovery cohort\***

| Outcome                   | n    | beta    | 95% CI          | p        |
|---------------------------|------|---------|-----------------|----------|
| TOTAL_FAT                 | 1750 | -5.344  | -27.28-16.59    | 0.63     |
| TOTAL_MASS                | 1750 | -10.166 | -55.01-34.68    | 0.66     |
| TOTAL_PFAT                | 1750 | -0.032  | -0.11-0.05      | 0.44     |
| ANDROID_FAT               | 1750 | 2.577   | -7.22-12.38     | 0.61     |
| ANDROID_MASS              | 1750 | 5.064   | -13.42-23.55    | 0.59     |
| ANDROID_PFAT              | 1750 | 0.005   | -0.1-0.11       | 0.93     |
| GYNOID_FAT                | 1750 | -7.921  | -21.4-5.56      | 0.25     |
| GYNOID_MASS               | 1750 | -15.231 | -42.97-12.51    | 0.28     |
| GYNOID_PFAT               | 1750 | -0.050  | -0.13-0.03      | 0.22     |
| TOTAL_PERCENT_FAT         | 1750 | -0.004  | -0.08-0.08      | 0.92     |
| BODY_MASS_INDEX           | 1750 | 0.149   | -0.45-0.74      | 0.62     |
| ANDROID_GYNOID_RATIO      | 1750 | 0.002   | -0.00084-0.0047 | 0.17     |
| ANDROID_PERCENT_FAT       | 1750 | 0.005   | -0.1-0.11       | 0.93     |
| GYNOID_PERCENT_FAT        | 1750 | -0.050  | -0.13-0.03      | 0.22     |
| FAT_MASS_RATIO            | 1750 | 0.005   | 0.0016-0.0074   | 0.00225  |
| TRUNK_LIMB_FAT_MASS_RATIO | 1750 | 0.007   | 0.0037-0.011    | 0.000117 |
| FAT_MASS_HEIGHT_SQUARED   | 1750 | 0.033   | -0.05-0.11      | 0.422    |
| TOTAL_FAT_MASS            | 1750 | 2.746   | -84.04-89.53    | 0.951    |
| GLOBAL_FAT                | 1750 | -3.066  | -90.56-84.43    | 0.945    |
| GLOBAL_MASS               | 1750 | -34.092 | -202.98-134.8   | 0.692    |
| GLOBAL_PFAT               | 1750 | -0.016  | -0.1-0.07       | 0.705    |
| HEAD_FAT                  | 1750 | -0.368  | -2.12-1.38      | 0.681    |
| HEAD_MASS                 | 1750 | -2.770  | -10.15-4.62     | 0.462    |
| HEAD_PFAT                 | 1750 | 0.006   | -0.0026-0.0014  | 0.183    |
| LARM_FAT                  | 1750 | 1.654   | -4.96-8.27      | 0.624    |
| LARM_MASS                 | 1750 | -2.245  | -12.41-7.92     | 0.665    |
| LARM_PFAT                 | 1750 | 0.032   | -0.09-0.16      | 0.606    |
| RARM_FAT                  | 1750 | 2.092   | -4.3-8.48       | 0.521    |
| RARM_MASS                 | 1750 | -1.769  | -12.08-8.55     | 0.737    |
| RARM_PFAT                 | 1750 | 0.042   | -0.08-0.16      | 0.490    |
| TRUNK_FAT                 | 1750 | 26.380  | -24.08-76.84    | 0.306    |
| TRUNK_MASS                | 1750 | 37.376  | -55.31-130.06   | 0.429    |
| TRUNK_PFAT                | 1750 | 0.030   | -0.06-0.12      | 0.536    |
| L_LEG_FAT                 | 1750 | -14.150 | -29.21-0.91     | 0.066    |
| L_LEG_MASS                | 1750 | -28.815 | -56.72--0.91    | 0.043    |
| L_LEG_PFAT                | 1750 | -0.079  | -0.18-0.02      | 0.105    |
| R_LEG_FAT                 | 1750 | -14.513 | -30-0.97        | 0.066    |
| R_LEG_MASS                | 1750 | -26.408 | -54.8-1.98      | 0.068    |
| R_LEG_PFAT                | 1750 | -0.093  | -0.19-0.01      | 0.063    |
| SUBTOT_FAT                | 1750 | 1.463   | -85.46-88.39    | 0.974    |
| SUBTOT_MASS               | 1750 | -21.861 | -182.34-138.62  | 0.789    |
| SUBTOT_PFAT               | 1750 | -0.007  | -0.09-0.08      | 0.868    |
| WBTOT_FAT                 | 1750 | 1.095   | -86.71-88.9     | 0.980    |
| WBTOT_MASS                | 1750 | -24.630 | -189.48-140.21  | 0.770    |

---

|            |      |        |            |       |
|------------|------|--------|------------|-------|
| WBTOT_PFAT | 1750 | -0.006 | -0.09-0.08 | 0.888 |
|------------|------|--------|------------|-------|

---

\*Linear regression was performed to examine the association of microbiome risk score with components of body fat distribution, adjusted for total energy intake, age, sex, alcohol status, smoking status, education, marital status and income

Microbiome risk score: components including index of  $\alpha$ -diversity (observe species), and 13 taxa-related features (*f\_\_lactobacillaceae*, *c\_\_alphaproteobacteria*, *f\_\_mogibacteriaceae*, *g\_\_clostridiaceae* spp, *c\_\_deltaproteobacteria*, *g\_\_butyrivibrio*, *o\_\_lactobacillales*, *f\_\_comamonadaceae*, *g\_\_roseburia*, *g\_\_megamonas*, *g\_\_mogibacteriaceae* spp, *g\_\_dorea*, *s\_\_dispar*).



**Table S8. Associations of the microbiome risk score with body fat distribution in the external validation cohort 1\***

| <b>Outcome</b>            | <b>n</b> | <b>Beta</b> | <b>95% CI</b>   | <b>p</b> |
|---------------------------|----------|-------------|-----------------|----------|
| TOTAL_FAT                 | 185      | -5.120      | -75.29-55.53    | 0.884    |
| TOTAL_MASS                | 185      | 19.324      | -123.67-136.55  | 0.782    |
| TOTAL_PFAT                | 185      | -0.102      | -0.35-0.15      | 0.449    |
| ANDROID_FAT               | 185      | 15.973      | -12.86-41.36    | 0.273    |
| ANDROID_MASS              | 185      | 37.384      | -18.1-83.13     | 0.169    |
| ANDROID_PFAT              | 185      | 0.074       | -0.24-0.42      | 0.678    |
| GYNOID_FAT                | 185      | -21.093     | -65.86-17.6     | 0.348    |
| GYNOID_MASS               | 185      | -18.060     | -109.09-56.94   | 0.686    |
| GYNOID_PFAT               | 185      | -0.191      | -0.44-0.06      | 0.157    |
| TOTAL_PERCENT_FAT         | 185      | 0.009       | -0.23-0.26      | 0.943    |
| BODY_MASS_INDEX           | 185      | 0.122       | -0.08-0.3       | 0.231    |
| ANDROID_GYNOID_RATIO      | 185      | 0.009       | -0.00033-0.0178 | 0.059    |
| ANDROID_PERCENT_FAT       | 185      | 0.074       | -0.24-0.42      | 0.678    |
| GYNOID_PERCENT_FAT        | 185      | -0.191      | -0.44-0.06      | 0.157    |
| FAT_MASS_RATIO            | 185      | 0.007       | 0.0067-0.016    | 0.159    |
| TRUNK_LIMB_FAT_MASS_RATIO | 185      | 0.015       | 0.0023-0.03     | 0.020    |
| FAT_MASS_HEIGHT_SQUARED   | 185      | 0.045       | -0.06-0.15      | 0.438    |
| TOTAL_FAT_MASS            | 185      | 102.950     | -177.6-360.91   | 0.477    |
| GLOBAL_FAT                | 185      | 102.918     | -177.61-360.84  | 0.477    |
| GLOBAL_MASS               | 185      | 213.248     | -313.55-684.25  | 0.427    |
| GLOBAL_PFAT               | 185      | 0.009       | -0.23-0.26      | 0.944    |
| HEAD_FAT                  | 185      | 2.185       | -3.92-6.54      | 0.437    |
| HEAD_MASS                 | 185      | 4.644       | -20.15-23.75    | 0.694    |
| HEAD_PFAT                 | 185      | 0.021       | -0.01-0.04      | 0.108    |
| LARM_FAT                  | 185      | 4.281       | -15.06-23.13    | 0.677    |
| LARM_MASS                 | 185      | 9.323       | -20.45-36.65    | 0.544    |
| LARM_PFAT                 | 185      | -0.038      | -0.39-0.34      | 0.844    |
| RARM_FAT                  | 185      | 6.775       | -13.95-25.61    | 0.524    |
| RARM_MASS                 | 185      | 14.976      | -19.18-43.11    | 0.371    |
| RARM_PFAT                 | 185      | -0.028      | -0.37-0.35      | 0.885    |
| TRUNK_FAT                 | 185      | 103.849     | -39.88-242.11   | 0.171    |
| TRUNK_MASS                | 185      | 202.665     | -76.77-457.47   | 0.158    |
| TRUNK_PFAT                | 185      | 0.090       | -0.16-0.37      | 0.529    |
| L_LEG_FAT                 | 185      | -4.545      | -61.75-44.84    | 0.874    |
| L_LEG_MASS                | 185      | -10.916     | -107.84-78.19   | 0.827    |
| L_LEG_PFAT                | 185      | -0.075      | -0.42-0.23      | 0.669    |
| R_LEG_FAT                 | 185      | -9.819      | -65.59-40.44    | 0.731    |
| R_LEG_MASS                | 185      | -8.410      | -102.94-75.64   | 0.861    |
| R_LEG_PFAT                | 185      | -0.141      | -0.47-0.18      | 0.419    |
| SUBTOT_FAT                | 185      | 100.541     | -176.34-356.24  | 0.483    |
| SUBTOT_MASS               | 185      | 207.638     | -303.48-667.37  | 0.426    |
| SUBTOT_PFAT               | 185      | 0.007       | -0.25-0.28      | 0.963    |
| WBTOT_FAT                 | 185      | 102.726     | -178.09-360.61  | 0.478    |
| WBTOT_MASS                | 185      | 212.282     | -315.69-683.18  | 0.429    |
| WBTOT_PFAT                | 185      | 0.010       | -0.23-0.26      | 0.942    |

---

\*Linear regression was performed to examine the association of microbiome risk score with components of body fat distribution, adjusted for total energy intake, age, sex, alcohol status, smoking status, education, marital status and income

Microbiome risk score: components including index of  $\alpha$ -diversity (observe species), and 13 taxa-related features (*f\_\_lactobacillaceae*, *c\_\_alphaproteobacteria*, *f\_\_mogibacteriaceae*, *g\_\_clostridiaceae* spp, *c\_\_deltaproteobacteria*, *g\_\_butyrivibrio*, *o\_\_lactobacillales*, *f\_\_comamonadaceae*, *g\_\_roseburia*, *g\_\_megamonas*, *g\_\_mogibacteriaceae* spp, *g\_\_dorea*, *s\_\_dispar*).
